# Supplementary material for: Sensitive high resolution ion microprobe – stable isotope (SHRIMP-SI) analysis of water in silicate glasses and nominally anhydrous reference minerals
Source: Royal Society of Chemistry journal article supplement (doi:10.1039/c5ja00047e), 2015-01-01
Supplement: c5ja00047e2.xlsx [file c5ja00047e2.xlsx]

## Sheet: SHRIMP SI dataset 1 (Sept 2012)
	16O1H/16O	95%T_err
Cr-diop	3.431e-05	8.3e-08
PMR-53cpx	6.5306e-05	7.8e-08
ND-61.1	0.0025293	1.522e-06
ND-61.2	0.0025424	1.801e-06
ND-61.3	0.00246323	2.214e-06
Cr-Diop	3.7253e-05	7.3e-08
Cr-Diop.2	3.7364e-05	7.7e-08
Pk-Ol.1	7.95e-05	3.03e-07
Pk-Ol.2	7.3938e-05	6.24e-07
Tan-opx.1	2.1305e-05	6.1e-08
KBH-1-cpx	9.0176e-05	7.9e-08
PMR-53-cpx-g2	6.1399e-05	8.3e-08
ND-60.1	0.00278646	2.216e-06
KBH-opx.1	6.332e-05	9.9e-08
24.1_glass	0.000778551	6.12e-07
36.4_glass	0.0015365	8.41e-07
PMR-53_cpx.2	6.5928e-05	7.8e-08
KBH-opx.2	5.8889e-05	9e-08
KBH-opx.3	5.7002e-05	8.2e-08
KBH-opx.4	5.8649e-05	8e-08
Cr-diop.2	3.6267e-05	5.5e-08
Tan-opx.2	1.9728e-05	9.2e-08
Tan-opx.3	1.9351e-05	7.4e-08
ND-70	0.00200728	1.651e-06
ND-70	0.0019756	7.9e-07

## Sheet: SHRIMP SI dataset2 (April 2013)
	16O1H/16O	95%T_err
24_1glass_1	0.000872674	5.92e-07
24_1glass_2	0.000873366	6.47e-07
24_1glass_3	0.0008724	4.22e-07
Tanopx_1	3.4292e-05	1.87e-07
Tanopx_2	3.5647e-05	3.6e-08
Tanopx_3	3.7255e-05	1.1e-07
PMR53cpx2_1	8.5533e-05	6.1e-08
PMR53cpx2_2	8.5573e-05	1.2e-08
PMR53cpx2_3	9.3061e-05	6.2e-08
ND70_1	0.00229513	1.33e-06
ND70_2	0.00229652	1.616e-06
ND70_3	0.0022969	1.46e-06
SanC_1	3.1828e-05	1.9e-07
SanC_2	3.2504e-05	2.8e-08
SanC_3	3.7825e-05	1.7e-08
PkOl_1	9.2992e-05	9.3e-08
PkOl_2	9.3369e-05	9.8e-08
PkOl_3	9.3069e-05	9.2e-08
ND61_1	0.00279981	9.66e-07
ND61_2	0.0027971	6.59e-07
ND61_3	0.00281272	1.227e-06
KBHcpx_1	0.000114478	1.59e-07
KBHcpx_2	0.000115807	3.2e-08
KBHcpx_3	0.000117488	2.7e-08
CrD_1	6.1329e-05	1.83e-07
CrD_2	6.0764e-05	6.6e-08
CrD_3	0.00014516	3.695e-06
PMR53cpx_1	8.1532e-05	3.84e-07
PMR53cpx_2	0.000178053	9.308e-06
PMR53cpx_3	7.7935e-05	6.6e-08
SupraSi_1	1.043e-05	4.8e-08
SupraSi_2	1.1219e-05	1.11e-07
SupraSi_3	1.2086e-05	1.35e-07
KBHopx_1	7.308e-05	8e-08
KBHopx_2	7.4835e-05	6.7e-08
KBHopx_3	7.4547e-05	8.1e-08
PMR53cpx	0.000111674	5.09e-07
TanOpx	2.8324e-05	1.04e-07
Cr-Diop	4.7379e-05	2.5e-08
PkOl	8.9784e-05	5.1e-08
SanC	2.9316e-05	1.4e-08

## Sheet: SHRIMP SI dataset 3 (July 2013)
	16O1H/16O	95%T_err
TanOpx_1	3.6686e-05	9.4e-08
TanOpx_2	3.686e-05	3.69e-07
TanOpx_3	3.6417e-05	1.82e-07
TanOpx_4	3.6809e-05	9e-08
PMR53cpx2_1	8.0386e-05	1.71e-07
PMR53cpx_2	8.0693e-05	1.31e-07
PMR53cpx2_3	8.19e-05	1.45e-07
HTOl_1	7.5884e-05	2.399e-06
HTOl_2	4.2302e-05	5.5e-07
HTOl_3	4.1832e-05	2.65e-07
PMR53_1	9.9424e-05	6.86e-07
PMR53_2	8.0744e-05	6.4e-08
PMR53_3	8.8409e-05	6.72e-07
KBHopx_1	7.496e-05	1.31e-07
KBHopx_2	7.4417e-05	1.03e-07
KBHopx_3	7.2656e-05	8.2e-08
CrDiop_1	5.3595e-05	7.3e-08
CrDiop_2	5.7954e-05	4.58e-07
CrDiop_3	5.3401e-05	4.01e-07
CrDiop_4	5.6113e-05	5.4e-08
SupraSi_1	1.748e-05	4.67e-07
SupraSi_2	1.77e-05	2.24e-07
SupraSi_3	1.8225e-05	2.21e-07
KBHcpx_1	0.000101898	5.1e-08
KBHcpx_2	9.7341e-05	8.2e-08
KBHcpx_3	0.000107927	9.89e-07
KBHcpx_4	9.6443e-05	3.96e-07
PkOl_1	8.0114e-05	1.12e-07
PkOl_2	8.1541e-05	1.75e-07
PkOl_3	8.1459e-05	2.75e-07
SanC_1	4.488e-05	2.16e-07
SanC_2	4.1263e-05	2.19e-07
SanC_3	4.4268e-05	2.76e-07
ND70_1	0.00198762	5.9e-08
ND70_2	0.00198388	7.01e-07
ND70_3	0.00198418	3.85e-07
ND69_1	0.00247643	3.3e-07
ND69_2	0.00246193	7.73e-07
ND69_3	0.00247467	1.491e-06
36_4_1	0.00150715	7.32e-07
36_4_2	0.00151229	2.86e-07
36_4_3	0.00150126	1.04e-07
24_1_1	0.000768507	8.6e-08
24_1_2	0.000769724	5.26e-07
24_1_3	0.000767359	1.07e-07
ND61_1	0.00255426	1.029e-06
ND61_2	0.00254867	1.555e-06
ND61_3	0.00248993	1.084e-06
ND60_1	0.00273443	1.286e-06
ND60_2	0.00274706	1.25e-06
ND60_3	0.00272913	6.54e-07
CrDiop_5	5.2706e-05	1.106e-06
SupraSi_4	1.17e-05	1.62e-07
KBHcpx_4	9.0268e-05	8.8e-08
TanOpx_5	2.7806e-05	1.1e-07
TanOpx_6	2.6969e-05	2.43e-07
CrDiop_6	3.9743e-05	1.44e-07
CrDiop_7	4.1028e-05	1.03e-07
CrDiop_8	3.9602e-05	1.84e-07
KBHcpx_5	8.7398e-05	2.13e-07
KBHcpx_6	8.4089e-05	3.4e-08
PkOl_4	7.5593e-05	2.12e-07
PkOl_5	7.0065e-05	1.4e-08
SupraSi_5	1.2298e-05	4.42e-07
CrDiop_10	5.2189e-05	6.9e-07
CrDiop_11	5.0691e-05	2.83e-07
SupraSi_7	1.0103e-05	1.9e-07
SupraSi_8	1.3846e-05	5.13e-07
SupraSi_9	1.4012e-05	3.81e-07
CrDiop_12	4.0561e-05	6.9e-08
CrDiop_13	4.5393e-05	4.7e-08
CrDiop_14	4.8461e-05	1.82e-07
TanOpx_7	2.5245e-05	1.75e-07
TanOpx_8	2.6679e-05	8.1e-08
TanOpx_9	2.6677e-05	2.08e-07
TanOpx_10	2.6134e-05	9.8e-08
KBHcpx_7	9.2226e-05	1.6e-07
KBHcpx_8	9.3252e-05	3.4e-08
KBHcpx_9	9.3614e-05	2.28e-07
PkOl_6	7.3162e-05	2.05e-07
PkOl_7	7.0058e-05	1.97e-07
PkOl_8	6.9355e-05	1.56e-07

## Sheet: Cameca 6f dataset 1 (Oct 2012)
	17/30Si	95%T_err
SanCarlos@1.ais	0.00136901	6.55926e-05
SanCarlos@2.ais	0.00133124	2.15695e-05
SanCarlos@3.ais	0.00132003	1.29585e-05
36_4glass@5.ais	1.63333	0.012542
36_4glass@4.ais	1.67333	0.00952896
TanOpx@6.ais	0.00856495	5.32e-05
TanOpx@7.ais	0.00844887	9.13901e-05
TanOpx@7.ais	0.00844887	9.13901e-05
TanOpx@8.ais	0.00868561	9.24632e-05
24_1@9.ais	0.77327	0.00341072
24_1@10.ais	0.77386	0.00372453
24_1@11.ais	0.7768	0.00374627
ND61@12.ais	2.75226	0.0101769
ND61@13.ais	2.6594	0.0364662
ND61@14.ais	2.93709	0.0252119
KBH-opx@15.ais	0.0521794	0.000391256
KBH-opx@16.ais	0.0540607	0.000554623
KBH-opx@17.ais	0.0518623	0.000579807
ND60@18.ais	2.87903	0.0552463
ND60@19.ais	3.02915	0.0303929
ND60@20.ais	3.06981	0.018105
PMR-53cpx@21.ais	0.0494624	0.000233678
PMR-53cpx@22.ais	0.0498078	0.00044191
PMR-53cpx@23.ais	0.0484606	0.000498523
HeatT_SanC@24.ais	0.0244875	0.00326151
HeatT_SanC@25.ais	0.00154692	0.000225543
HeatT_SanC@26.ais	0.00246856	0.000517413
Cr_D@27.ais	0.0233782	0.000167876
Cr_D@28.ais	0.0237802	0.000236213
Cr_D@29.ais	0.0250119	0.000102514
KBH_cpx@30.ais	0.0754707	0.000741196
KBH_cpx@31.ais	0.0732427	0.000702197
KBH_cpx@32.ais	0.0709741	0.000447879
ND69@33.ais	2.75794	0.0141853
ND69@34.ais	2.72036	0.020229
ND69@35.ais	2.76168	0.0214732
PkOl@36.ais	0.0740778	0.00037499
PkOl@37.ais	0.0678609	0.000347858
PkOl@38.ais	0.0694319	0.000256064
ND70@39.ais	2.19667	0.00758531
ND70@40.ais	2.19674	0.0282671
ND70@41.ais	2.20097	0.00950399
PMR_cpx2@42.ais	0.0527435	0.000586333
PMR_cpx2@43.ais	0.0519611	0.000427615
PMR_cpx2@44.ais	0.051649	0.000320232
ND60@19.ais	3.03483	0.0396294

## Sheet: Cameca 6f dataset 2 (Oct 2012)
	17/30Si	95%T_err
SupraSi.ais	0.00365343	0.000250549
TanOpx@1.ais	0.0105402	0.000118893
TanOpx@2.ais	0.0104792	8.64546e-05
TanOpx@3.ais	0.0102772	0.000162461
TanOpx@4.ais	0.00980937	0.000124631
36_4@5.ais	1.81083	0.0103381
36_4@6.ais	2.0343	0.0185728
36_4@7.ais	1.84562	0.013283
36_4@8.ais	1.85934	0.016806
SanC@9.ais	0.0032834	8.76184e-05
SanC@10.ais	0.00625325	0.000230139
SanC@11.ais	0.00344544	7.44336e-05
SanC@12.ais	0.00332492	7.31207e-05
SupraSi@13.ais	0.00207168	0.000219814
Pk_ol@14.ais	0.0727008	0.00106855
Pk_ol@15.ais	0.0739222	0.00076381
Pk_ol@16.ais	0.0748347	0.000588528
Pk_ol@17.ais	0.0735292	0.0011084
ND-69@18.ais	3.09221	0.0484287
ND-69@19.ais	3.1115	0.0267146
ND-69@20.ais	3.1429	0.0375768
ND-69@21.ais	3.2094	0.0320526
KBH_cpx@22.ais	0.0852985	0.000596163
KBH_cpx@23.ais	0.0862046	0.000779222
KBH_cpx@24.ais	0.0816465	0.000748306
KBH_cpx@25.ais	0.0865956	0.000573913
SupraSi@26.ais	0.00099459	5.52942e-05
Cr-Di@27.ais	0.0255852	0.000320888
CrDi@28.ais	0.0255464	0.000294621
CrDi@29.ais	0.0265111	0.000201528
CrDi@30.ais	0.0261377	0.000318024
PMR-53cpx1@31.ais	0.0498061	0.000668544
PMR-53cpx1@32.ais	0.0517345	0.000960387
PMR-53cpx1@33.ais	0.20695	0.014223
PMR-53cpx1@34.ais	0.0523561	0.000562127
ND-60@35.ais	3.46465	0.0447948
ND-60@36.ais	3.34665	0.0402906
ND-60@37.ais	3.37892	0.0186578
ND-60@38.ais	3.46917	0.0319237
SupraSi@39.ais	0.000903485	5.65496e-05
ND-61@40.ais	3.07055	0.0399807
ND-61@41.ais	3.05244	0.0266879
ND-61@42.ais	3.16458	0.0312589
ND-61@43.ais	2.97161	0.0226847
KBH-opx@44.ais	0.0563384	0.000849743
KBH-opx@45.ais	0.0559648	0.000867947
KBH-opx@46.ais	0.0546522	0.000632118
KBH-opx@47.ais	0.0567737	0.00036037
HT-SanC@48.ais	0.00224053	4.152e-05
HT-SanC@49.ais	0.0025008	0.000162649
HT-SanC@50.ais	0.00217165	9.86521e-05
HT-SanC@51.ais	0.00216837	6.35215e-05
SupraSi@52.ais	0.000901419	1.96126e-05
ND70@53.ais	2.49351	0.023798
ND70@54.ais	2.52831	0.0137114
ND70@55.ais	2.41784	0.0200886
ND70@56.ais	2.45939	0.0420167
PMR-53cpx2@57.ais	0.055947	0.000319795
PMR-53cpx2@58.ais	0.0555763	0.000677169
PMR-53cpx2@59.ais	0.0561515	0.000402173
PMR-53cpx2@60.ais	0.0562186	0.00032468
24_1@61.ais	0.86336	0.00636246
24_1@62.ais	0.85043	0.010623
24_1@63.ais	0.85264	0.012305
SupraSi@65.ais	0.000656566	2.11202e-05
